# Supplementary material
Source: PubMed Central journal article supplement (PMC3570502)
Supplement: cc-12-133-s01.pdf [file cc-12-133-s01.pdf]

## **Supplemental Material to:**

**Ekaterina Lesovaya, Alexander Yemelyanov,  
Kirill Kirsanov, Alexander Popa, Gennady Belitsky,  
Marianna Yakubovskaya, Leo I. Gordon,  
Steven T. Rosen and Irina Budunova**

**Combination of a selective activator of  
the glucocorticoid receptor Compound A with  
a proteasome inhibitor as a novel strategy for  
chemotherapy of hematologic malignancies**

**Cell Cycle 2012; 12(1)**

**<http://dx.doi.org/10.4161/cc.23048>**

**<http://www.landesbioscience.com/journals/cc/article/23048>**

## Supplement 1. Primer sequences

| Gene             | Forward primer                 | Reverse primer                  |
|------------------|--------------------------------|---------------------------------|
| <i>GR exon 2</i> | 5'-agctgcctcttactaatcgg -3'    | 5'- gctttaagtctgtttcccc -3'     |
| <i>GR exon 3</i> | 5'- agttcactgtgagcattctg -3'   | 5'- ggaaaataaactcttcaaaa -3'    |
| <i>GR exon 4</i> | 5'- ctgtgaaactttaatagtgcc -3'  | 5'- gaaacaattgctttcagata -3'    |
| <i>GR exon 5</i> | 5'- taaactgtgtagcgcagacctt -3' | 5'- tgtattcacctgactctcccc -3'   |
| <i>GR exon 6</i> | 5'- ctgaagagtgttgccctcata -3'  | 5'- gggaaaatgacacacatacaa -3'   |
| <i>GR exon 7</i> | 5'- aaaatgtgctttttgggg -3'     | 5'- aggtgaaaaggtgttctacc -3'    |
| <i>GR exon 8</i> | 5'- cttttagttcctaaggacggtc -3' | 5'- caagctatcaccaacatccaca -3'  |
| <i>GR exon 9</i> | 5'- actgaccaatttggagcct -3'    | 5'- atttcaccatctactctccc -3'    |
| <i>FKBP51</i>    | 5'- gaatggtgaggaaacgccgat -3'  | 5'- tgccaagactaaagacaaatggt -3' |
| <i>GR</i>        | 5'- cagcccagccatgaacacc -3'    | 5'- cgcagaaccaccaggggcct -3'    |
| <i>GAPDH</i>     | 5'- aaggtgaagtcggagtcac -3'    | 5'- ggggtcattgatggcaacaata -3'  |

## CEM

## NCEB

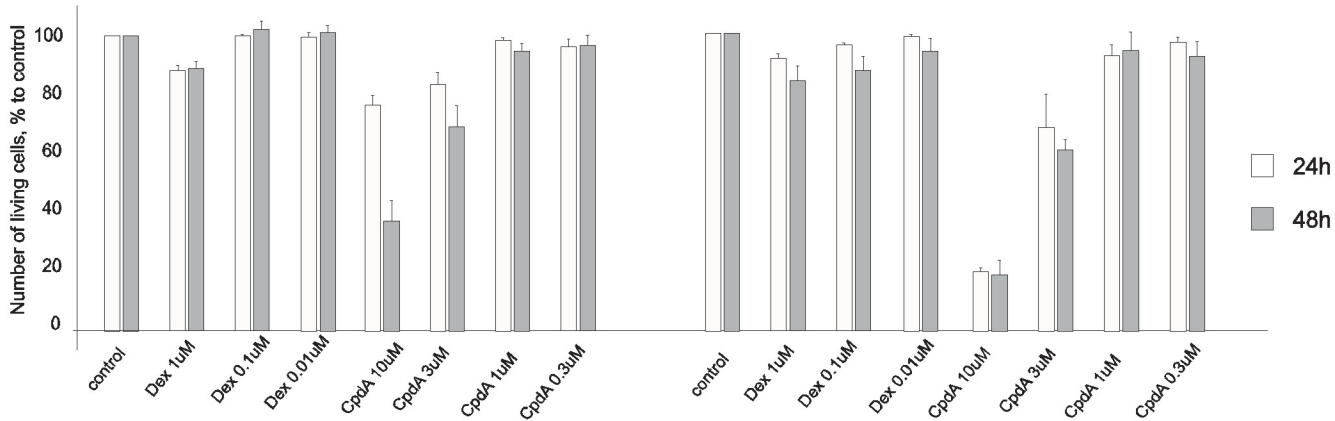

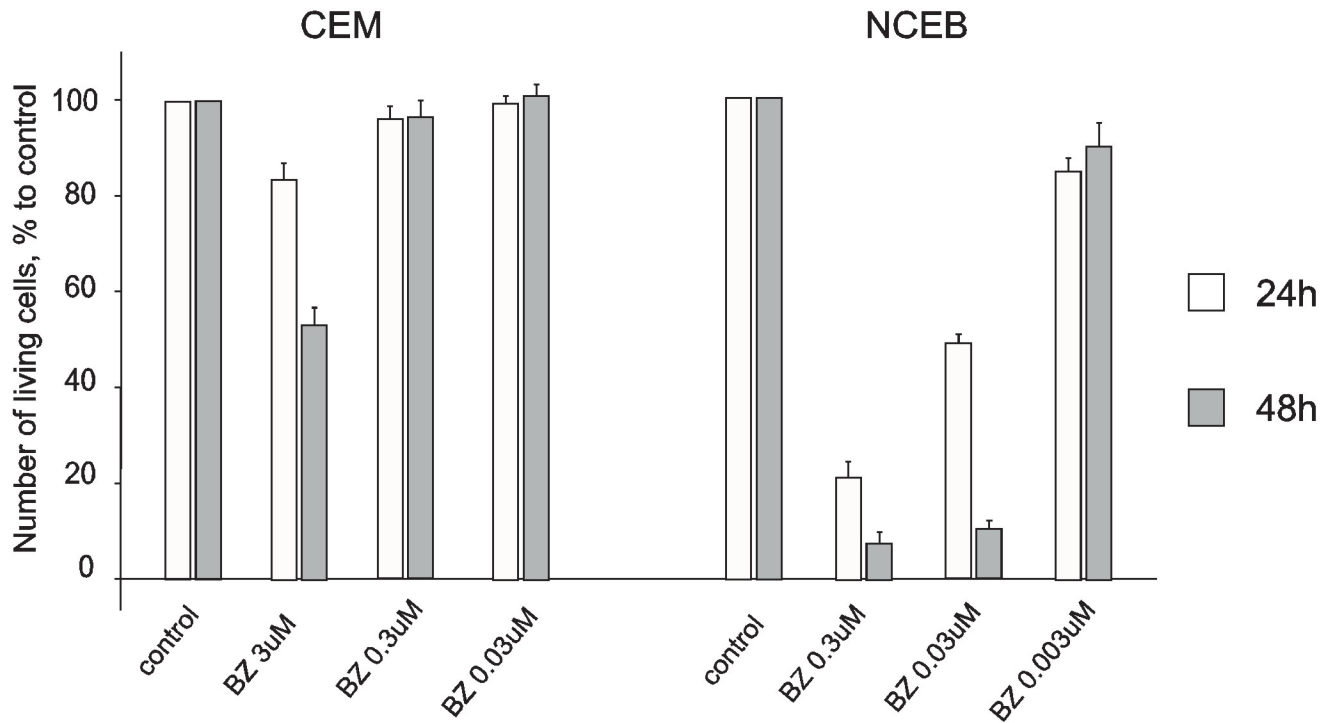

**Supplement 2.** Optimal concentrations for Dex, CpdA and BZ. CEM and NCEB cells were cultured in the presence of indicated dose of Dex, CpdA, BZ or vehicle for 24-48 h. Number of the living cells were estimated by direct cell counting.

**Supplement 3.** Optimal concentrations for BZ. CEM and NCEB cells were cultured in the presence of indicated dose of BZ or vehicle for 24-48 h. Number of the living cells were estimated by direct cell counting.
